# Supplementary material for: Avaliação da aderência ao aço inoxidável e ao polietileno por três sorovares de Salmonella e da capacidade de desinfecção dessas superfícies
Source: Royal Society of Chemistry journal article supplement (doi:10.1039/d3cp01175e), 2007-01-01
Supplement: d3cp01175e3.pdf [file d3cp01175e3.pdf]

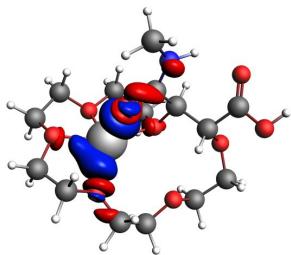

$$\Delta\rho_1^\sigma$$

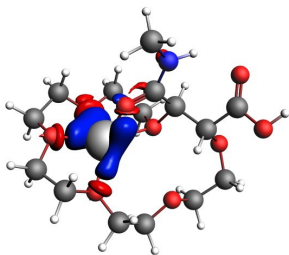

$$\Delta\rho_2^\sigma$$

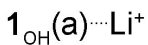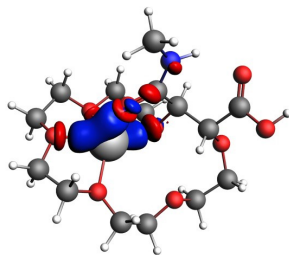

$$\Delta\rho_3^\sigma$$

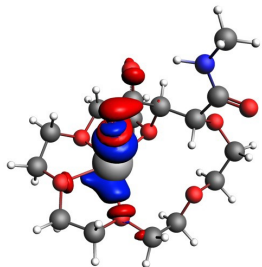

$$\Delta\rho_1^\sigma$$

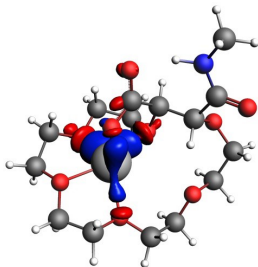

$$\Delta\rho_2^\sigma$$

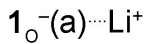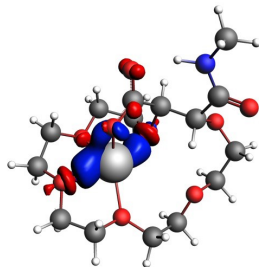

$$\Delta\rho_3^\sigma \text{ and } \pi$$
