# Supplementary material for: Avaliação da aderência ao aço inoxidável e ao polietileno por três sorovares de Salmonella e da capacidade de desinfecção dessas superfícies
Source: Royal Society of Chemistry journal article supplement (doi:10.1039/d3cp01175e), 2007-01-01
Supplement: d3cp01175e4.pdf [file d3cp01175e4.pdf]

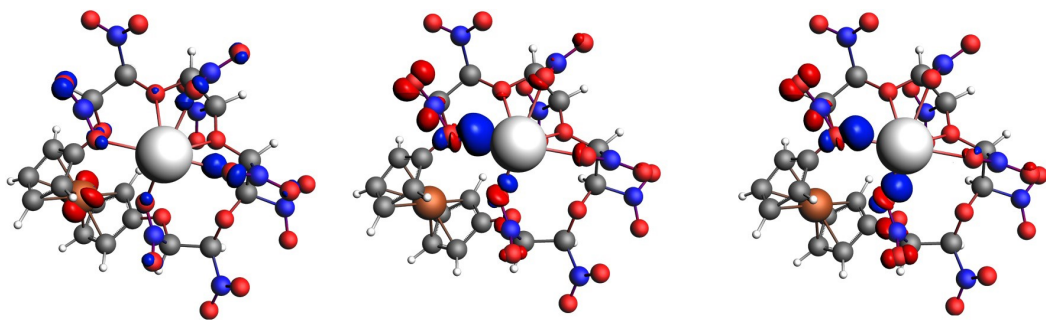

$\Delta\rho_1^\sigma$

$\Delta\rho_2^\sigma$

$\Delta\rho_3^\sigma$

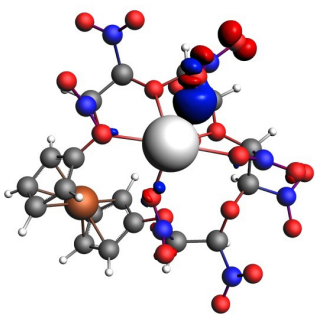

$\Delta\rho_4^{\sigma \text{ and } \pi}$

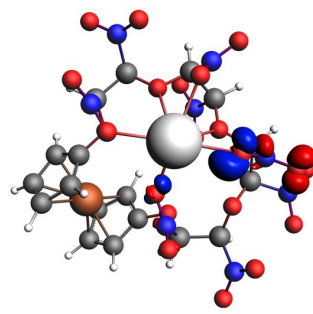

$\Delta\rho_5^{\sigma \text{ and } \pi}$

**2Fe<sup>+</sup>(e)⋯Na<sup>+</sup>**

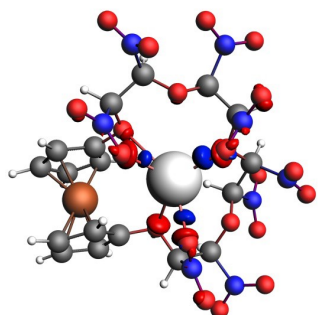

$\Delta\rho_1^\sigma$

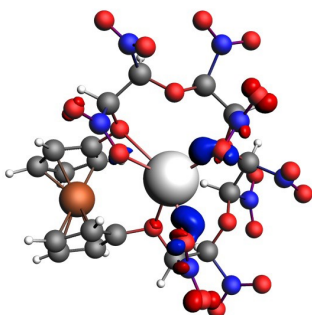

$\Delta\rho_2^\pi$

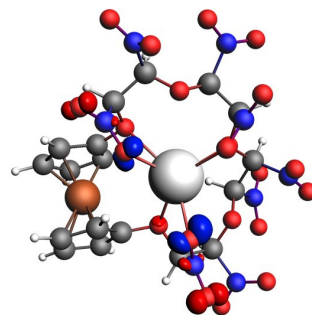

$\Delta\rho_3^\pi$

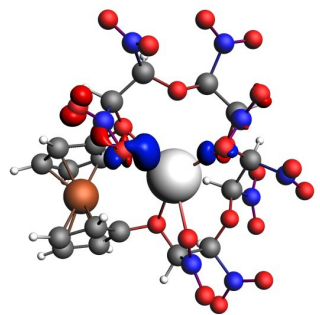

$\Delta\rho_4^{\sigma \text{ and } \pi}$

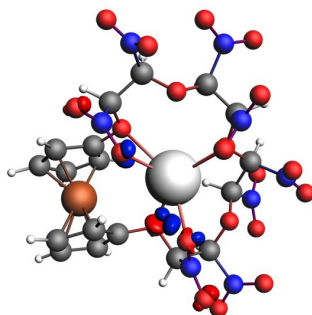

$\Delta\rho_5^{\sigma \text{ and } \pi}$

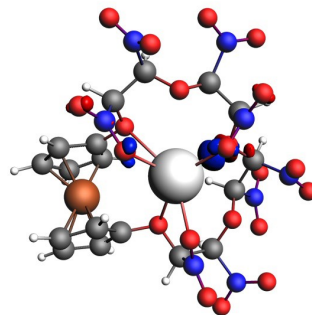

$\Delta\rho_6^{\sigma \text{ and } \pi}$

**2Fe(e)⋯Na<sup>+</sup>**
