# Supplementary material for: Avaliação da aderência ao aço inoxidável e ao polietileno por três sorovares de Salmonella e da capacidade de desinfecção dessas superfícies
Source: Royal Society of Chemistry journal article supplement (doi:10.1039/d3cp01175e), 2007-01-01
Supplement: d3cp01175e10.pdf [file d3cp01175e10.pdf]

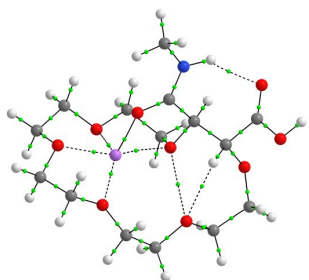

$1_{\text{OH}}(\text{a}) \cdots \text{Li}^+$

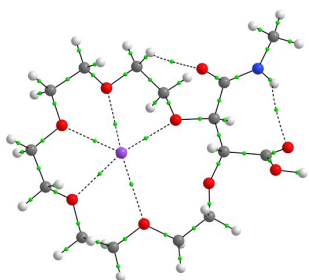

$1_{\text{OH}}(\text{a}) \cdots \text{Na}^+$

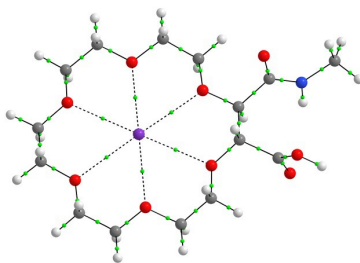

$1_{\text{OH}}(\text{a}) \cdots \text{K}^+$

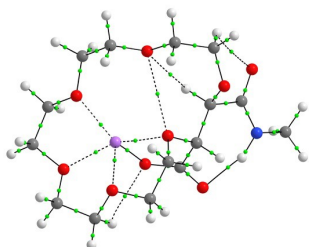

$1_{\text{O}^-}(\text{a}) \cdots \text{Li}^+$

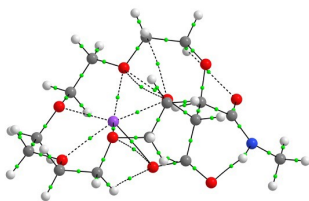

$1_{\text{O}^-}(\text{a}) \cdots \text{Na}^+$

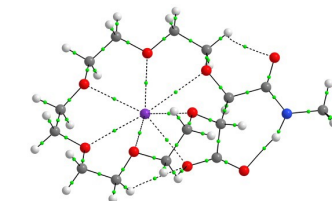

$1_{\text{O}^-}(\text{a}) \cdots \text{K}^+$

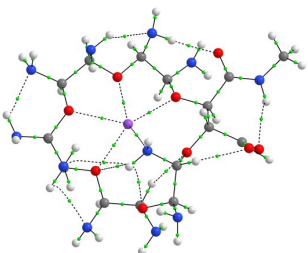

$1_{\text{OH}}(\text{b}) \cdots \text{Na}^+$

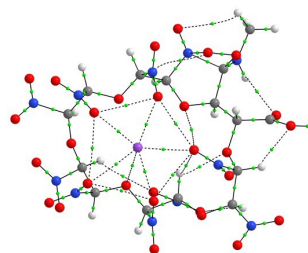

$1_{\text{OH}}(\text{c}) \cdots \text{Na}^+$

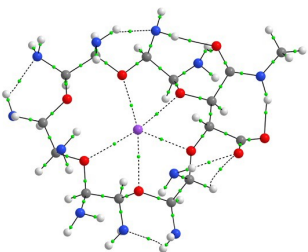

$1_{\text{O}^-}(\text{b}) \cdots \text{Na}^+$

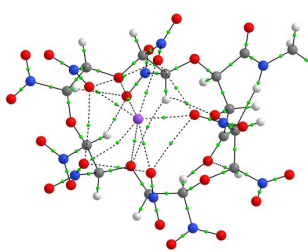

$1_{\text{O}^-}(\text{c}) \cdots \text{Na}^+$
