# Supplementary material for: Avaliação da aderência ao aço inoxidável e ao polietileno por três sorovares de Salmonella e da capacidade de desinfecção dessas superfícies
Source: Royal Society of Chemistry journal article supplement (doi:10.1039/d3cp01175e), 2007-01-01
Supplement: d3cp01175e12.pdf [file d3cp01175e12.pdf]

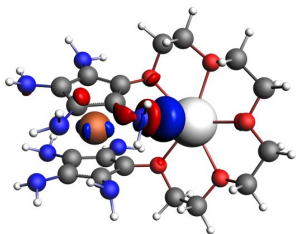

$\Delta\rho_{1^{\sigma}}$   
 $2\text{Fe}^+(\text{b})\cdots\text{Na}^+$

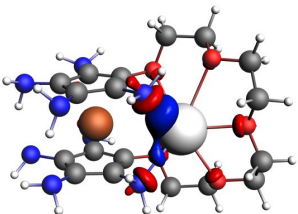

$\Delta\rho_{1^{\sigma}}$

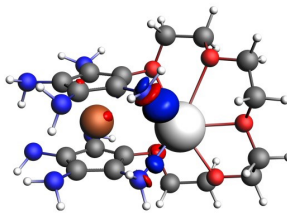

$\Delta\rho_{2^{\sigma}}$

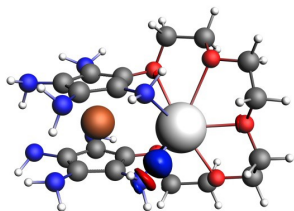

$\Delta\rho_{3^{\sigma}}$

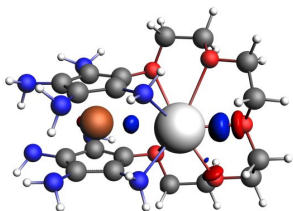

$\Delta\rho_{4^{\sigma}}$

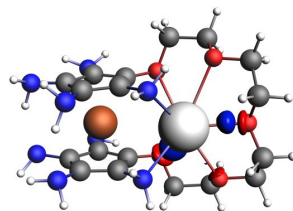

$\Delta\rho_{5^{\sigma}}$

$2\text{Fe}(\text{b})\cdots\text{Na}^+$
