# Supplementary material for: Avaliação da aderência ao aço inoxidável e ao polietileno por três sorovares de Salmonella e da capacidade de desinfecção dessas superfícies
Source: Royal Society of Chemistry journal article supplement (doi:10.1039/d3cp01175e), 2007-01-01
Supplement: d3cp01175e13.pdf [file d3cp01175e13.pdf]

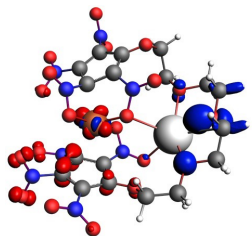

$\Delta\rho_1^\sigma$

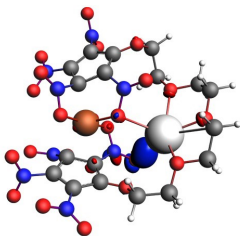

$\Delta\rho_2^\sigma$

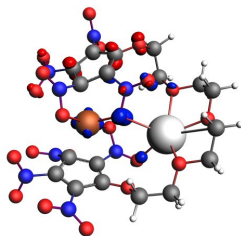

$\Delta\rho_3^\sigma$

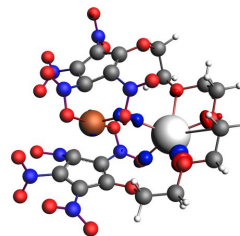

$\Delta\rho_4^\sigma$

$2\text{Fe}^+(\text{c})\cdots\text{Na}^+$

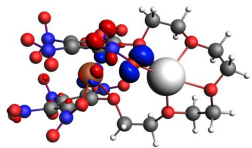

$\Delta\rho_1^\pi$

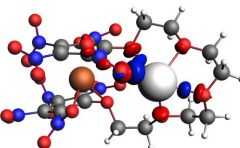

$\Delta\rho_2^\sigma$

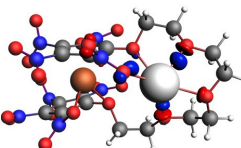

$\Delta\rho_3^{\sigma \text{ and } \pi}$

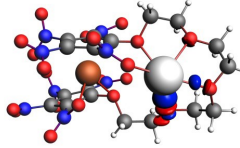

$\Delta\rho_4^\sigma$

$2\text{Fe}(\text{c})\cdots\text{Na}^+$
